# Supplementary material for: Integrated molecular approach including single-cell FISH enables accurate detection of genetic rearrangements, classification, and identification of novel variants in pediatric brain tumors
Source: Research Square preprint supplement (doi:10.21203/rs.3.rs-7244481/v1), 2025-08-05
Supplement: Supplementary file 1 [file 028407ab4ad6953006bf0fec.docx]

**Supplementary Methods:**

**Immunohistochemistry**

Immunohistochemistry (IHC) panels, tailored to each tumor type and aligned with the 2021 WHO Classification of Tumors of the Central Nervous System [2], included markers such as Synaptophysin, GFAP, Olig2, Ki67, P53, IDH1 p.R132H, BRAF p.V600E, ATRX, and EGFR, and were applied to all 50 pediatric tumor samples. IHC was performed on 3 μm sections using a streptavidin–biotin–immunoperoxidase protocol and automated staining (Leica Bond III). Incubation conditions were optimized for each primary antibody (Details are available upon request). Staining intensity was evaluated on a scale of 0 to 3: "no expression" (0), "weak/focal expression" (1+), "moderate expression" (2+), and "overexpression" (3+). Positive cell quantification was conducted by analyzing at least 500 tumor cells per case. Two expert neuropathologists (F.G. and M.A.) independently confirmed histological diagnoses. Targeted IHC analysis was also performed using mutation-specific antibodies for key hotspot mutations, as anti-IDH1 p.R132H, anti-H3.3 p.K27M and p.G34R/V, and anti-BRAF p.V600E. Positive cases identified by IHC underwent confirmatory Sanger sequencing using the AB 3130 Genetic Analyzer (Applied Biosystems), ensuring the accuracy of genetic findings. Our integrative approach combined morphology, immunophenotype, and molecular genetics to achieve precise tumor classification and identify novel rearrangements.

**Interphase FISH for Analysis of Relevant Somatic Structural Variants**

FISH was employed as the primary and first-line technique to detect somatic structural variants across all 50 tumors, enabling the rapid and targeted identification of genetic rearrangements aligned with the histopathological features of each case. The analysis was customized to investigate specific structural variants suspected based on the initial histopathological evaluation. FFPE tumor sections (5 μm thick) were cut and mounted on positively charged slides. The neoplastic regions of interest were identified from the H&E-stained slides and marked. Non-tumorous areas were carefully scraped off the slides designated for FISH analysis to ensure specificity. FISH analysis employed fluorescence-labeled Break-apart and fusion probes from Empire Genomics (Buffalo, NY, USA). The specific probes included: MYB 6q23.2 Break-apart (MYBBA-20-GROR), MYBL1 8q13.1 Break-apart (MYBL1BA-20-GROR), C11orf95 (ZFTA) 11q13.1 Break-apart (C11orf95BA-20-GROR), YAP1 11q22.1 Break-apart (YAP1BA-20-GROR), MN1 22q12.1 Break-apart (MN1BA-20-GROR), KIAA1549-BRAF 7q34 Break-apart Extended (KIAA1549-BRAFBA-20-TR), FGFR1 8p11.22 Break-apart (FGFR11BA-20-GROR), PRKC 17q24.2/SLC44A1 9q31.1 Probe set (PRKC-SLC44A1-20-ORGR). All probes followed a standardized protocol. Slides underwent deparaffinization in xylene and ethanol in decreasing concentrations, pretreatment with a denaturation solution (1 mol/L sodium thiocyanate), and digestion with 0.65% pepsin in protease buffer for 45 minutes. After two washes in 2× SSC buffer, probes were diluted (1:10) in hybridization buffer as per the manufacturer’s instructions, and 10 µL of probe mix was applied to the selected neoplastic area. Coverslips (18 mm) were mounted and sealed with rubber cement. Denaturation (6 minutes at 83°C) and hybridization (18 hours at 37°C) were performed using a ThermoBrite automated hybridizer (TopBrite, No. AS-05010-00). Post-hybridization washes included incubation in a restriction buffer at 72°C, followed by counterstaining with DAPI. Neoplastic regions were first identified under 20× magnification, correlating the FISH slide with the H&E-stained slide. Individual nuclei hybridized with FISH probes were examined under 100× magnification, capturing approximately 15–20 cells per field. Images were acquired using an Axio Imager M1 fluorescence microscope (Carl Zeiss) and analyzed with ISIS image analysis software (MetaSystems). Sequential filters for DAPI, FITC, rhodamine, and Aqua were used, capturing five focal planes (0.5 µm apart). The software reconstructed images with color-coded signals: blue (B), green (G), orange (O), and aqua (Aq). A minimum of 10 images per sample were captured at 100× magnification, ensuring the evaluation of at least 200 tumor nuclei. Initial assessments were conducted directly on the fluorescence microscope and subsequently validated through digitally acquired images. Following the WHO 2021 guidelines and current literature on FISH analysis for structural variants, samples were classified as positive if ≥20% of tumor nuclei displayed either separated signals for Break-apart probes or characteristic fusion patterns for fusion probes [2, 22, 57–61]. Advanced single-cell analysis was than conducted on representative tumor cells selected at 100× magnification. Using specialized tools, structural variants were assessed by measuring signal distances and analyzing patterns to enhance the accuracy of the evaluation.

**Genome-wide DNA Methylation Profiling Using the Illumina 850,000 EPIC Array**

Methylation patterns at CpG dinucleotides across the genome provide unique molecular signatures that facilitate accurate tumor diagnosis and classification [5-7]. DNA methylation profiling was performed on 23 out of 50 cases. Tumor regions with a high proportion of neoplastic cells (≥70%) were identified through examination of H&E-stained slides. The selected tumor regions were manually micro-dissected from FFPE tissue sections. Genomic DNA was extracted using the QIAamp DNA FFPE Tissue Kit (QIAGEN), following the manufacturer’s guidelines. A total of 500 ng of genomic DNA was subjected to sodium bisulfite conversion using the EZ DNA Methylation-Gold Kit (D5005, Zymo Research), a process that selectively converts unmethylated cytosines to uracil, allowing the detection of methylation patterns. The bisulfite-converted DNA was quantified, amplified, fragmented, and hybridized to the Infinium Methylation EPIC BeadChip (Illumina), which interrogates 850,000 CpG sites across the genome. Data acquisition was performed using the Illumina iScan system, generating raw data files (IDAT format) for downstream analysis. Bioinformatic processing and classification were conducted using the Brain Tumor Classifier v11b6 (https://www.molecularneuropathology.org/mnp). According to existing literature, a methylation score ≥0.8 is considered diagnostically reliable for identifying specific tumor subtypes [5,65]. This threshold ensures high precision in distinguishing samples with well-defined epigenetic profiles. Scores ranging from 0.3 to 0.8 require cautious interpretation, as predictions in this range may lack robustness. Scores below 0.3 indicate low confidence in the classifier's output, suggesting a higher likelihood of misclassification or insufficiently distinctive epigenetic features. Copy number variation (CNV) profiles were inferred from methylation array signal intensity data. Normalization and differential signals intensity analysis were performed using male and female normal genomic DNA reference samples. CNV profiles were visualized and mapped to genomic regions of interest using the Integrative Genomics Viewer (IGV), enabling the identification of clinically relevant copy number variants in PBTs.
