# Supplementary material for: Integrated molecular approach including single-cell FISH enables accurate detection of genetic rearrangements, classification, and identification of novel variants in pediatric brain tumors
Source: Research Square preprint supplement (doi:10.21203/rs.3.rs-7244481/v1), 2025-08-05
Supplement: Supplementary file 2 [file 9bab9eed8bbdd658db4f1bf2.docx]

**Supplementary Tables:**

**Supplementary Tab. 1: Rearrangements and fusions assessed in our cohort of 50 PBTs.**

The table summarizes the diagnostic subtypes of PBTs linked to specific structural variants, along with the frequency of these alterations within each diagnostic class, based on existing literature. The last three columns on the right display the number of cases analyzed in this study using FISH, methylation profiling, and whole-transcriptome sequencing techniques.

| **Genetic alteration** | **Tumor types harboured rearrangements and fusions** | **Frequency (%) in literature** | **N° cases by FISH** | **N° cases by methylation** | **N° cases by RNA-seq** |
| --- | --- | --- | --- | --- | --- |
| ***MYB* rearrangements** | Diffuse astrocytoma *MYB-* or *MYBL1*-altered | 100% | 10 | 4 | 4 |
| ***MYBL1* rearrangements** |
| ***ZFTA* rearrangements** | Supratentorial ependymomas | 70% | 12 | 5 | 5 |
| ***YAP1* rearrangements** | 10%  >20% in <3 years |
| ***MN1* rearrangements** | Astroblastoma, *MN1*-altered | 100% | 8 | 4 | 3 |
| ***KIAA1549-BRAF* fusion** | Pilocytic astrocytoma and diffuse leptomeningeal glioneuronal tumor | 80% and 70%  respectively | 10 | 4 | 2 |
| ***FGFR1-TACC1* fusion** | Extraventricular neurocytoma | 70% | 6 | 3 | 1 |
| ***PRKCA-SLC44A1* fusion** | Papillary glioneuronal tumor | Multiple reported cases (70%) | 4 | 3 | 1 |
|  |  |  | **50 tot** | **23 tot** | **16 tot** |

**Supplementary Tab. 2: Key clinical and histopathological characteristics from a cohort of 50 PBTs, spanning various diagnostic classes.**

Frequencies for each parameter are provided, offering a comprehensive overview of the cohort's features and aiding in the understanding of tumor distribution and associated clinical profiles.

|  | **Clinical data** | **Frequency** |
| --- | --- | --- |
| **Sex** | Male | **64%** (32/50) |
| Female | **36%** (18/50) |
| **Age at onset** | ≤5 years | **26%** (13/50) |
| 6-10 years | **42%** (21/50) |
| >10 years | **32%** (16/50) |
| Medium age | **8,4** (1 min/19 max) |
| **Localization** | Parietal | **18%** (9/50) |
| Occipital | **4%** (2/50) |
| Temporal | **14%** (7/50) |
| Frontal | **38%** (19/50) |
| Hemispheric | **12%** (6/50) |
| Mesencephalic | **4%** (2/50) |
| Cerebellum/cranial fossa/4° ventricle | **10%** (5/50) |
| **First Histological diagnosis** | Low-grade astrocytoma | **20%** (10/50) |
| Supratentorial ependymoma | **24%** (12/50) |
| Astroblastoma | **16%** (8/50) |
| Pilocytic astrocitoma | **14%** (7/50) |
| diffuse leptomeningeal glioneuronal | **6%** (3/50) |
| Extraventricular Neurocytoma | **12%** (6/50) |
| Papillary Glioneuronal Tumor | **8%** (4/50) |

**Supplementary Tab. 3: Comparative analysis of results obtained using FISH, genomic DNA methylation profiling and whole-transcriptome sequencing.**

The FISH evaluation methods, including "signal distance measurement" for detecting rearrangements and "signal pattern analysis" for identifying fusions, demonstrate high concordance with methylation profiling (91.3%) and RNA-seq (81.2%) in diagnosing structural variants in pediatric brain tumors (PBTs). Discrepancies between FISH and other analytical methods are primarily attributed to two factors. First, in DNA methylation profiling, low epigenetic scores (<0.6) indicate unreliable predictions based on methylation patterns. Second, in RNA-seq, poor RNA quality and high intratumoral genetic heterogeneity significantly reduce sequencing sensitivity, leading to inconsistent results.

| Analysis | N° of Cases | Additional Information |
| --- | --- | --- |
| Samples analyzed via DNA methylation profiling | **23/50 (46%)** | Not pre-selected |
| FISH results confirmed by methylation | **21 (91.3%)** | Methylation score > 0.8 |
| FISH results Not confirmed by methylation | **2 (8.7%)** | Methylation score < 0.6 |
| Samples analyzed via RNA sequencing | **16/50 (32%)** | Selected from "Uncertain" cases |
| FISH results confirmed by sequencing | **13 (81.2%)** | Newly identified fusions |
| FISH results not confirmed by sequencing | **3 (18.8%)** | Low RNA quality and high heterogeneity |
